# Supplementary material for: Novel de novo heterozygous CACNA1A gene variant in generalised dystonia: a case report
Source: PubMed Central journal article supplement — BMJ Neurol Open. 2024 Jun 21;6(1):e000710. doi: 10.1136/bmjno-2024-000710 (PMC11191759; doi:10.1136/bmjno-2024-000710), 2024-06-21
Supplement: bmjno-2024-000710supp001.pdf [file bmjno-2024-000710supp001.pdf]

**Supplemental Table 1: Published cases of dystonia with a CACNA1A mutation**

| Reference | Age of onset | Initial symptoms                            | Additional Symptoms                                                                  | Family history                                                   | Genetic mutation                                                                                                                                                                                                                                                                               | MRI findings                                                       | Treatments tried                                                                                                                                |
|-----------|--------------|---------------------------------------------|--------------------------------------------------------------------------------------|------------------------------------------------------------------|------------------------------------------------------------------------------------------------------------------------------------------------------------------------------------------------------------------------------------------------------------------------------------------------|--------------------------------------------------------------------|-------------------------------------------------------------------------------------------------------------------------------------------------|
| 10        | 42 years     | Writer's cramp                              | A few years following initial symptoms, developed limb ataxia and later axial ataxia | Father: Parkinson's disease<br>D<br>Paternal Family with tremors | CAG 22 repeat expansion in CACNA1A gene, with 12 repeats detected in another allele                                                                                                                                                                                                            | Marked cerebellar atrophy with sparing of the cortex and brainstem | Trihexyphenidyl with satisfactory improvement of dystonia                                                                                       |
| 10        | 15 years     | Lower limb dystonia, then cervical dystonia | Mild axial and limb ataxia detected on initial exam                                  | Negative                                                         | CACNA1A, C2324 G < A: novel mutation, heterozygous, autosomal dominant, computer modelling suggests pathogenicity<br><br>PNKP, C1029 + 2 T < C, heterozygous, autosomal recessive, known pathological mutation<br><br>ATP7B, C2544 C < T, autosomal recessive, variant of unknown significance | Unremarkable                                                       | Levodopa: No improvement<br><br>Botox injection: Some improvement<br><br>Cyclobenzaprine: Some improvement<br><br>Acetazolamide: No improvement |
| 11        | 20s          | Poor balance                                | Hand dystonia with writer's cramp                                                    | Unknown                                                          | c.1748G>A missense mutation in CACNA1A gene                                                                                                                                                                                                                                                    | Cerebellar atrophy                                                 |                                                                                                                                                 |

|    |          |                           |                                                                    |                                                                                              |                                                                                                                                                                            |                                           |                                                                                                                                                                                                                  |
|----|----------|---------------------------|--------------------------------------------------------------------|----------------------------------------------------------------------------------------------|----------------------------------------------------------------------------------------------------------------------------------------------------------------------------|-------------------------------------------|------------------------------------------------------------------------------------------------------------------------------------------------------------------------------------------------------------------|
| 12 | 15 years | Exercise-induced diplopia | Later developed ataxia, then, at age 59, cervical and arm dystonia | Paternal grandmother:<br>Episodic dizziness and headache<br><br>Son:<br>Dizziness and ataxia | CACNA1A, a C-to-T substitution at exon 29 (c.4963C→T) resulted in the creation of a stop codon in place of glutamine (Q1561X) and the subsequent truncation of the protein | Unknown                                   | Acetazolamide improved episodic ataxia<br><br>Clonazepam and carbamazepine improved dystonia but worsened ataxia and dysarthria<br><br>For neck dystonia, botulinum toxin used                                   |
| 12 | 5 years  | Episodic ataxia           | At age 47 developed blepharospasm                                  | Unremarkable                                                                                 | CACNA1A, deletion of a C in exon 20 (c.3772delC) resulted in a frameshift and a predictive truncation of the putative protein at the start of exon 21 at c.3839            | Mild midline atrophy of cerebellar vermis | Acetazolamide, diazepam, phenytoin, carbamazepine, propranolol, verapamil, meclizine, nortriptyline, clonazepam (all with no improvement)<br><br>Botulinum toxin for blepharospasm with some initial improvement |
